# Supplementary material
Source: Elsevier journal article supplement (https://www.sciencedirect.com/science/article/pii/S1413867020300192)
Supplement: mmc1 [file S1413867020300192:mmc1.docx]

**Sirtuin1 Inhibitor Nicotinamide Disrupts HIV-1 Latency**

**Or**

**Sirtuin1 Inhibitor Nicotinamide Activates Latent HIV Ex-Vivo in ART Suppressed Individuals**

Ricardo Sobhie Diaz1*

*corresponding author: rsdiaz@catg,com,br

**Table S1.** Expansion of the virus in Allogenic System:

| Patient ID | Baseline Pre Antiretroviral Treatment Viral Load (copies/mL) | C1 (Day 3; copies/mL) | C2 (Day 7; copies/mL) | C3 (Day 10; copies/mL) |
| --- | --- | --- | --- | --- |
| S2 | 42,476 | 42,880 | 8,000 | BDL |
| S4 | 228 | 593 | BDL |  |
| S9 | 920 | 1,600 | BDL |  |
| S27 | 271 | BDL |  |  |
| S40 | 251 | 907 | BDL |  |
| S41 | 2,606 | 2,506 | BDL |  |
| S43 | 102,644 | 64,322 | 7,800 | BDL |
| NA8 | 12,600 | 21,060 | 4,050 | BDL |
| NA14 | 308 | BDL |  |  |
| C: Collection of supernatants for viral load quantified by qPCR; BDL: bellow detection limits | | | | |

**Table S2.** p24 Quantification of culture supernatants of selected samples with low, intermediate and high viral loads.

| Patient ID | Viral Load (Log) | Viral load copies/mL | p24 (pg/mL) |
| --- | --- | --- | --- |
| S01 | 3 | 1,454 | <detection limit |
| S04 | 3 | 2,018 | <detection limit |
| S08 | 3 | 2,419 | <detection limit |
| S31 | 4 | 10,000 | <detection limit |
| S34 | 4 | 20,000 | <detection limit |
| S12 | 5 | 49,746 | 6.149185 |
| S02 | 5 | 212,055 | 4.967574 |
| S43 | 6 | 531,271 | 1.127338 |
| S07 | 7 | 10,000,000 | 385.7417 |
|  |  |  |  |
| NA14 | 3 | 1,541 | <detection limit |
| NA13 | 3 | 1,648 | <detection limit |
| NA15 | 3 | 2,991 | <detection limit |
| NA3 | 5 | 45,378 | <detection limit |
| NA11 | 5 | 54,733 | 1.42274 |
| NA6 | 5 | 72,741 | <detection limit |
| NA8 | 6 | 343,366 | 18.9992 |
| NA5 | 6 | 775,268 | 49.42568 |
| NA2 | 7 | 10,000,000 | 31.70152 |


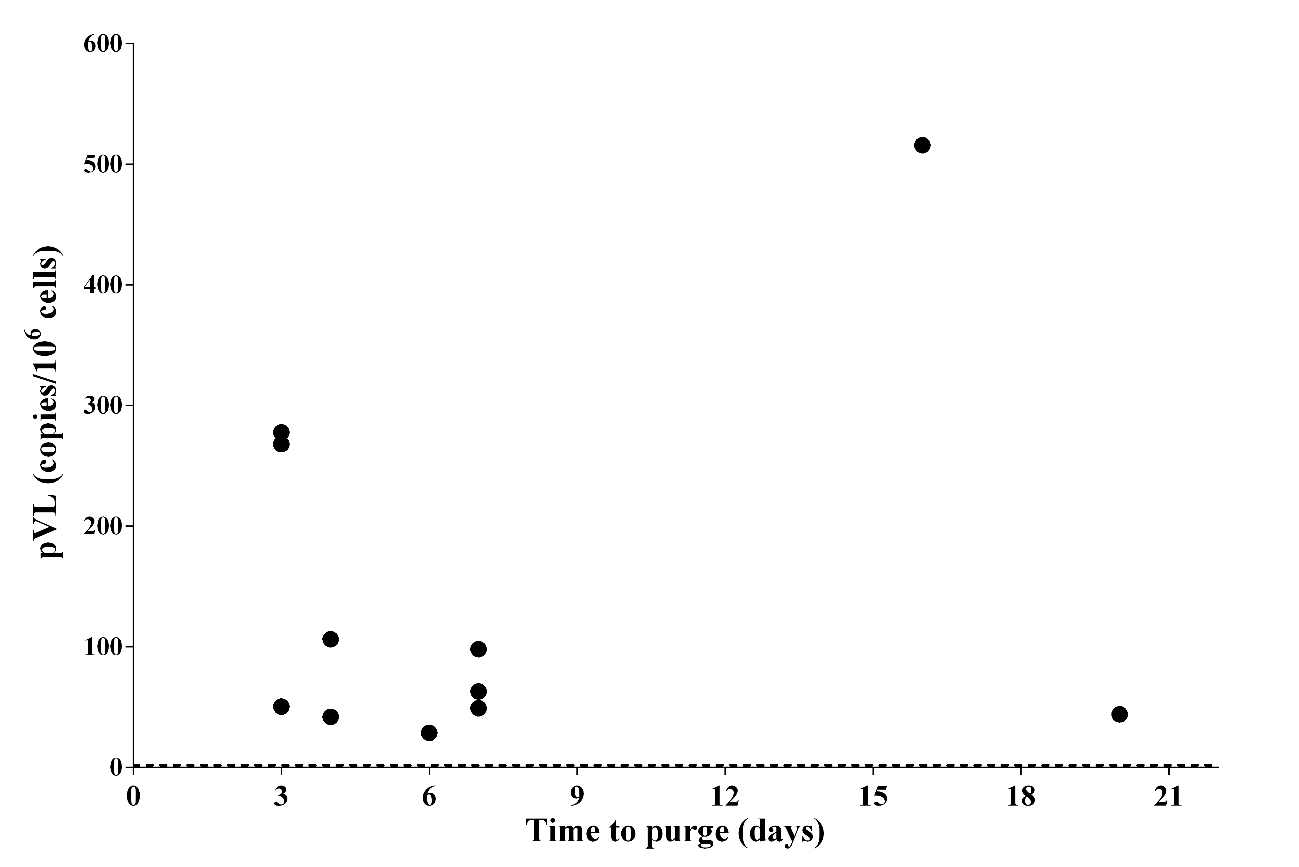


**Figure S1**. Time in days until the detection of HIV RNA viral load in the culture´s supernatant (time to purge) according to the proviral load HIV DNA (pVL) present in PBMCs.
